# Supplementary material
Source: ML conference proceedings conference paper supplement (https://openreview.net/forum?id=wpGJ2AX6SZ)

Correlation Coefficient

Subset 0

Subset 1

Subset Index

predictor

- random baseline
- drnet
- ihil
- jfaboy
- ngango2
- ngango3
- sensexdr
- uestc
- yww211
- radiologist 1
- radiologist 2
- radiologist 3

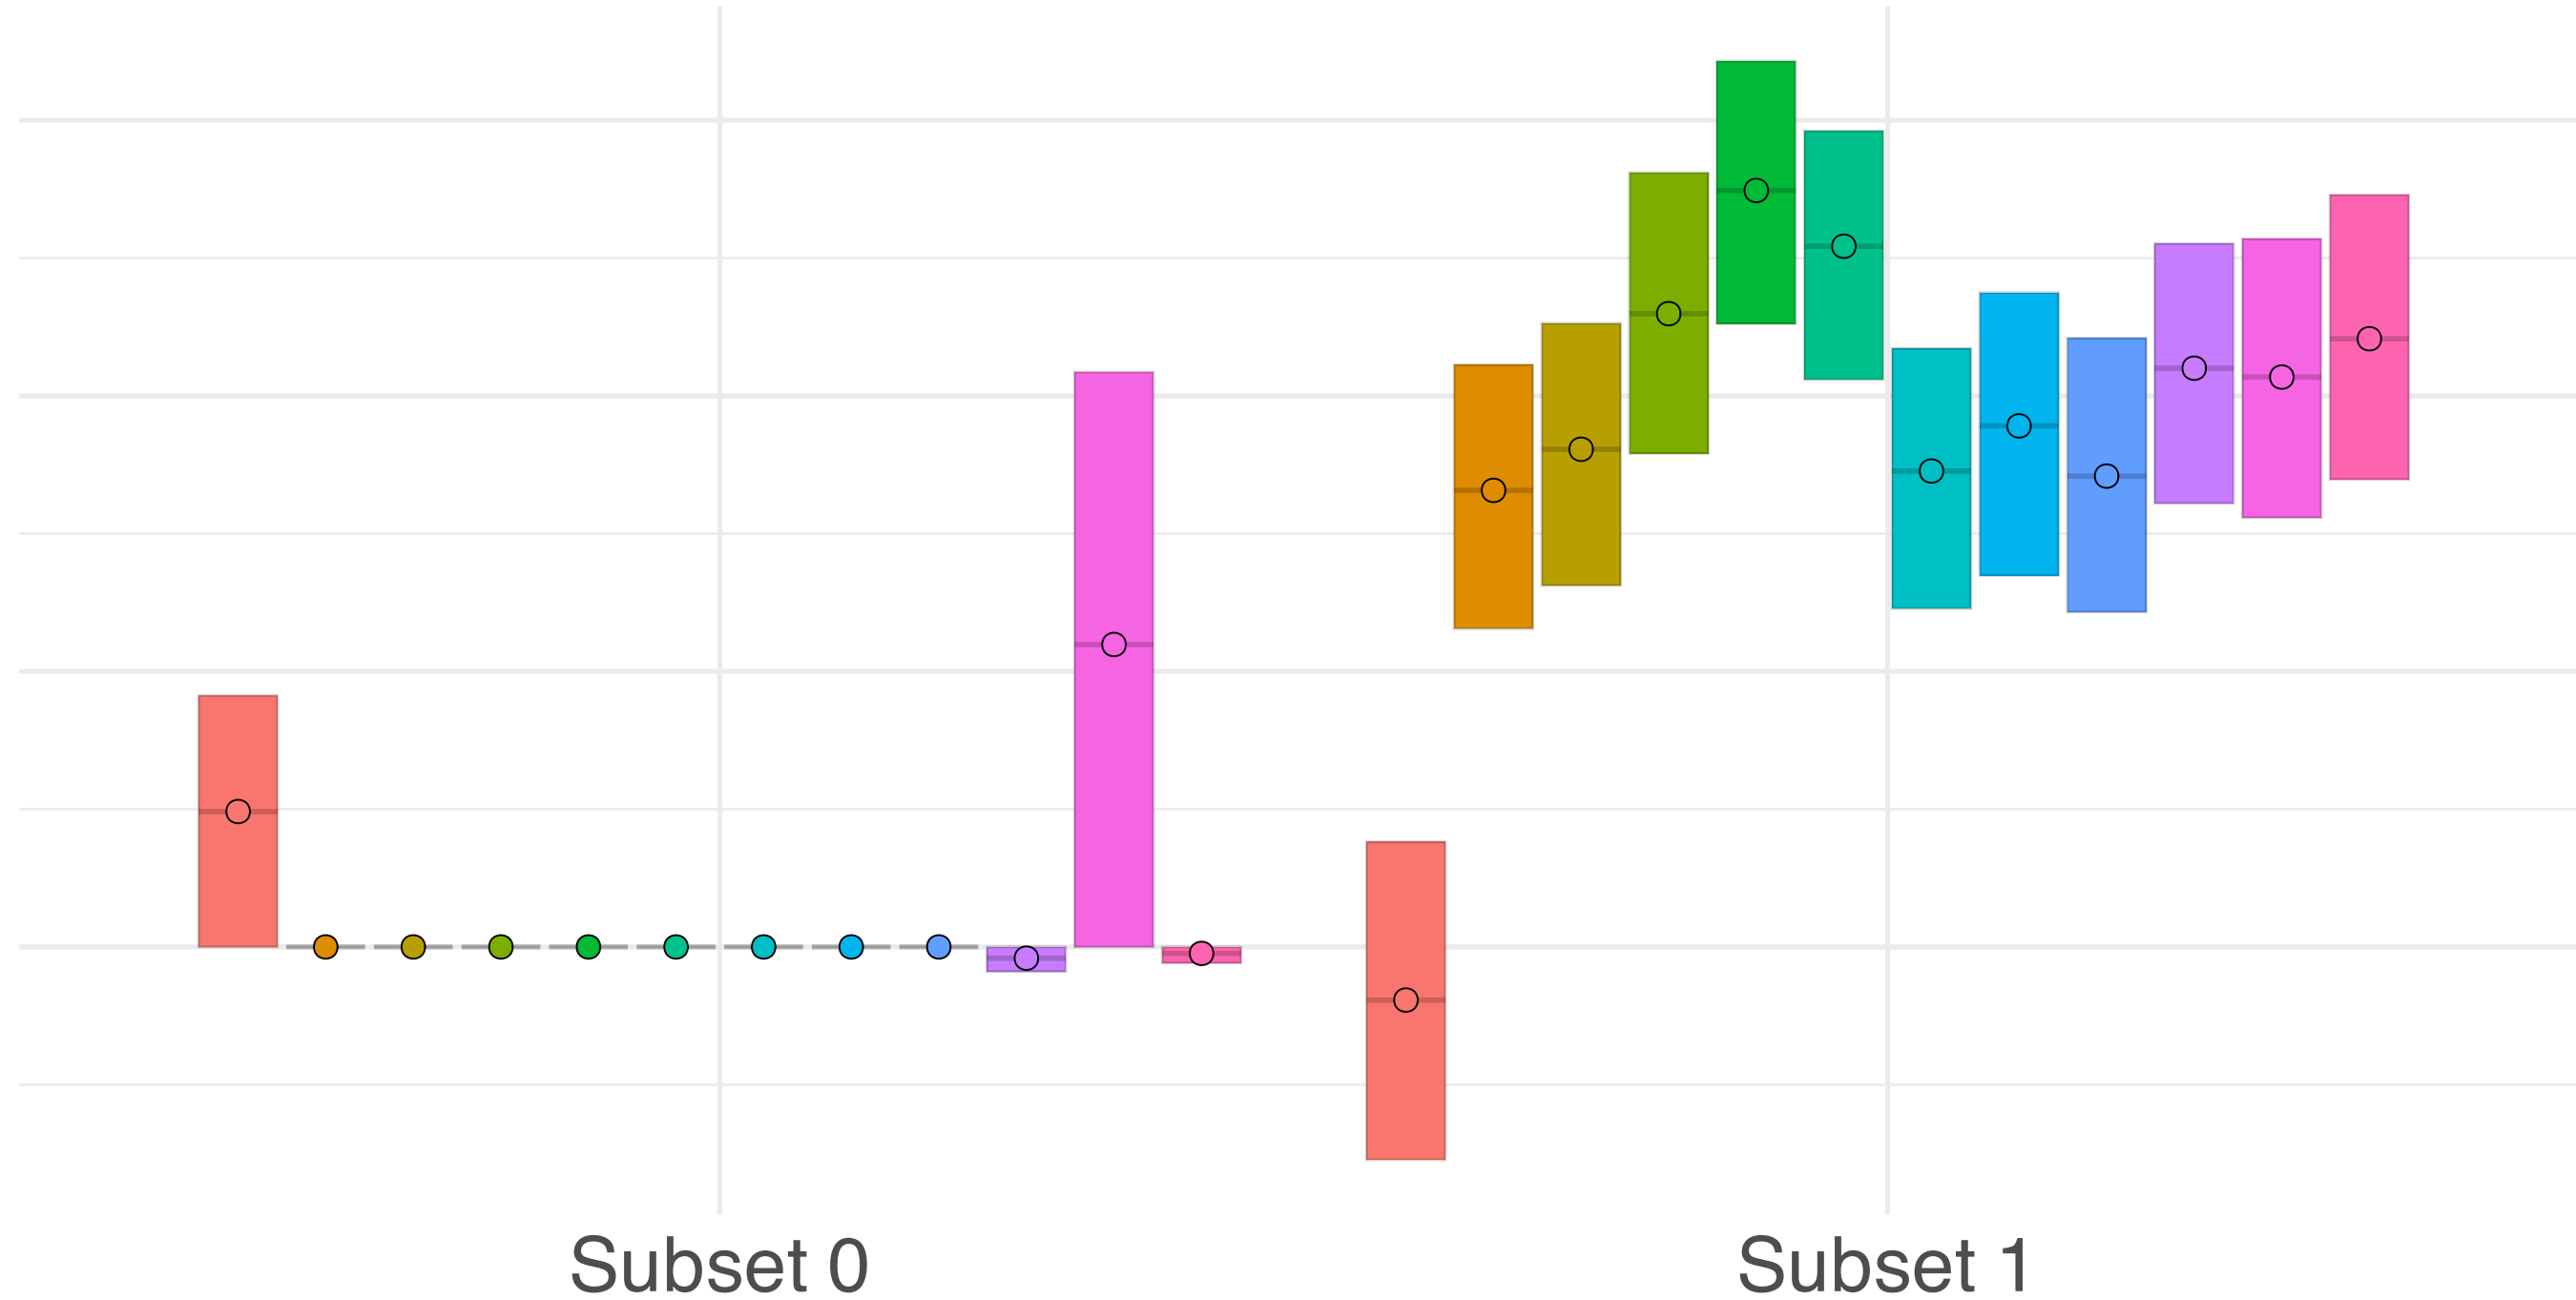

Supplement: supplementary_material [file attachment]
