# Supplementary material
Source: ML conference proceedings conference paper supplement (https://openreview.net/forum?id=wpGJ2AX6SZ)

Correlation Coefficient

Level Set Index

predictor

- random baseline
- multicalibrated predictor
- human (control)
- human (4 examples)
- human (8 examples)
- human (12 examples)

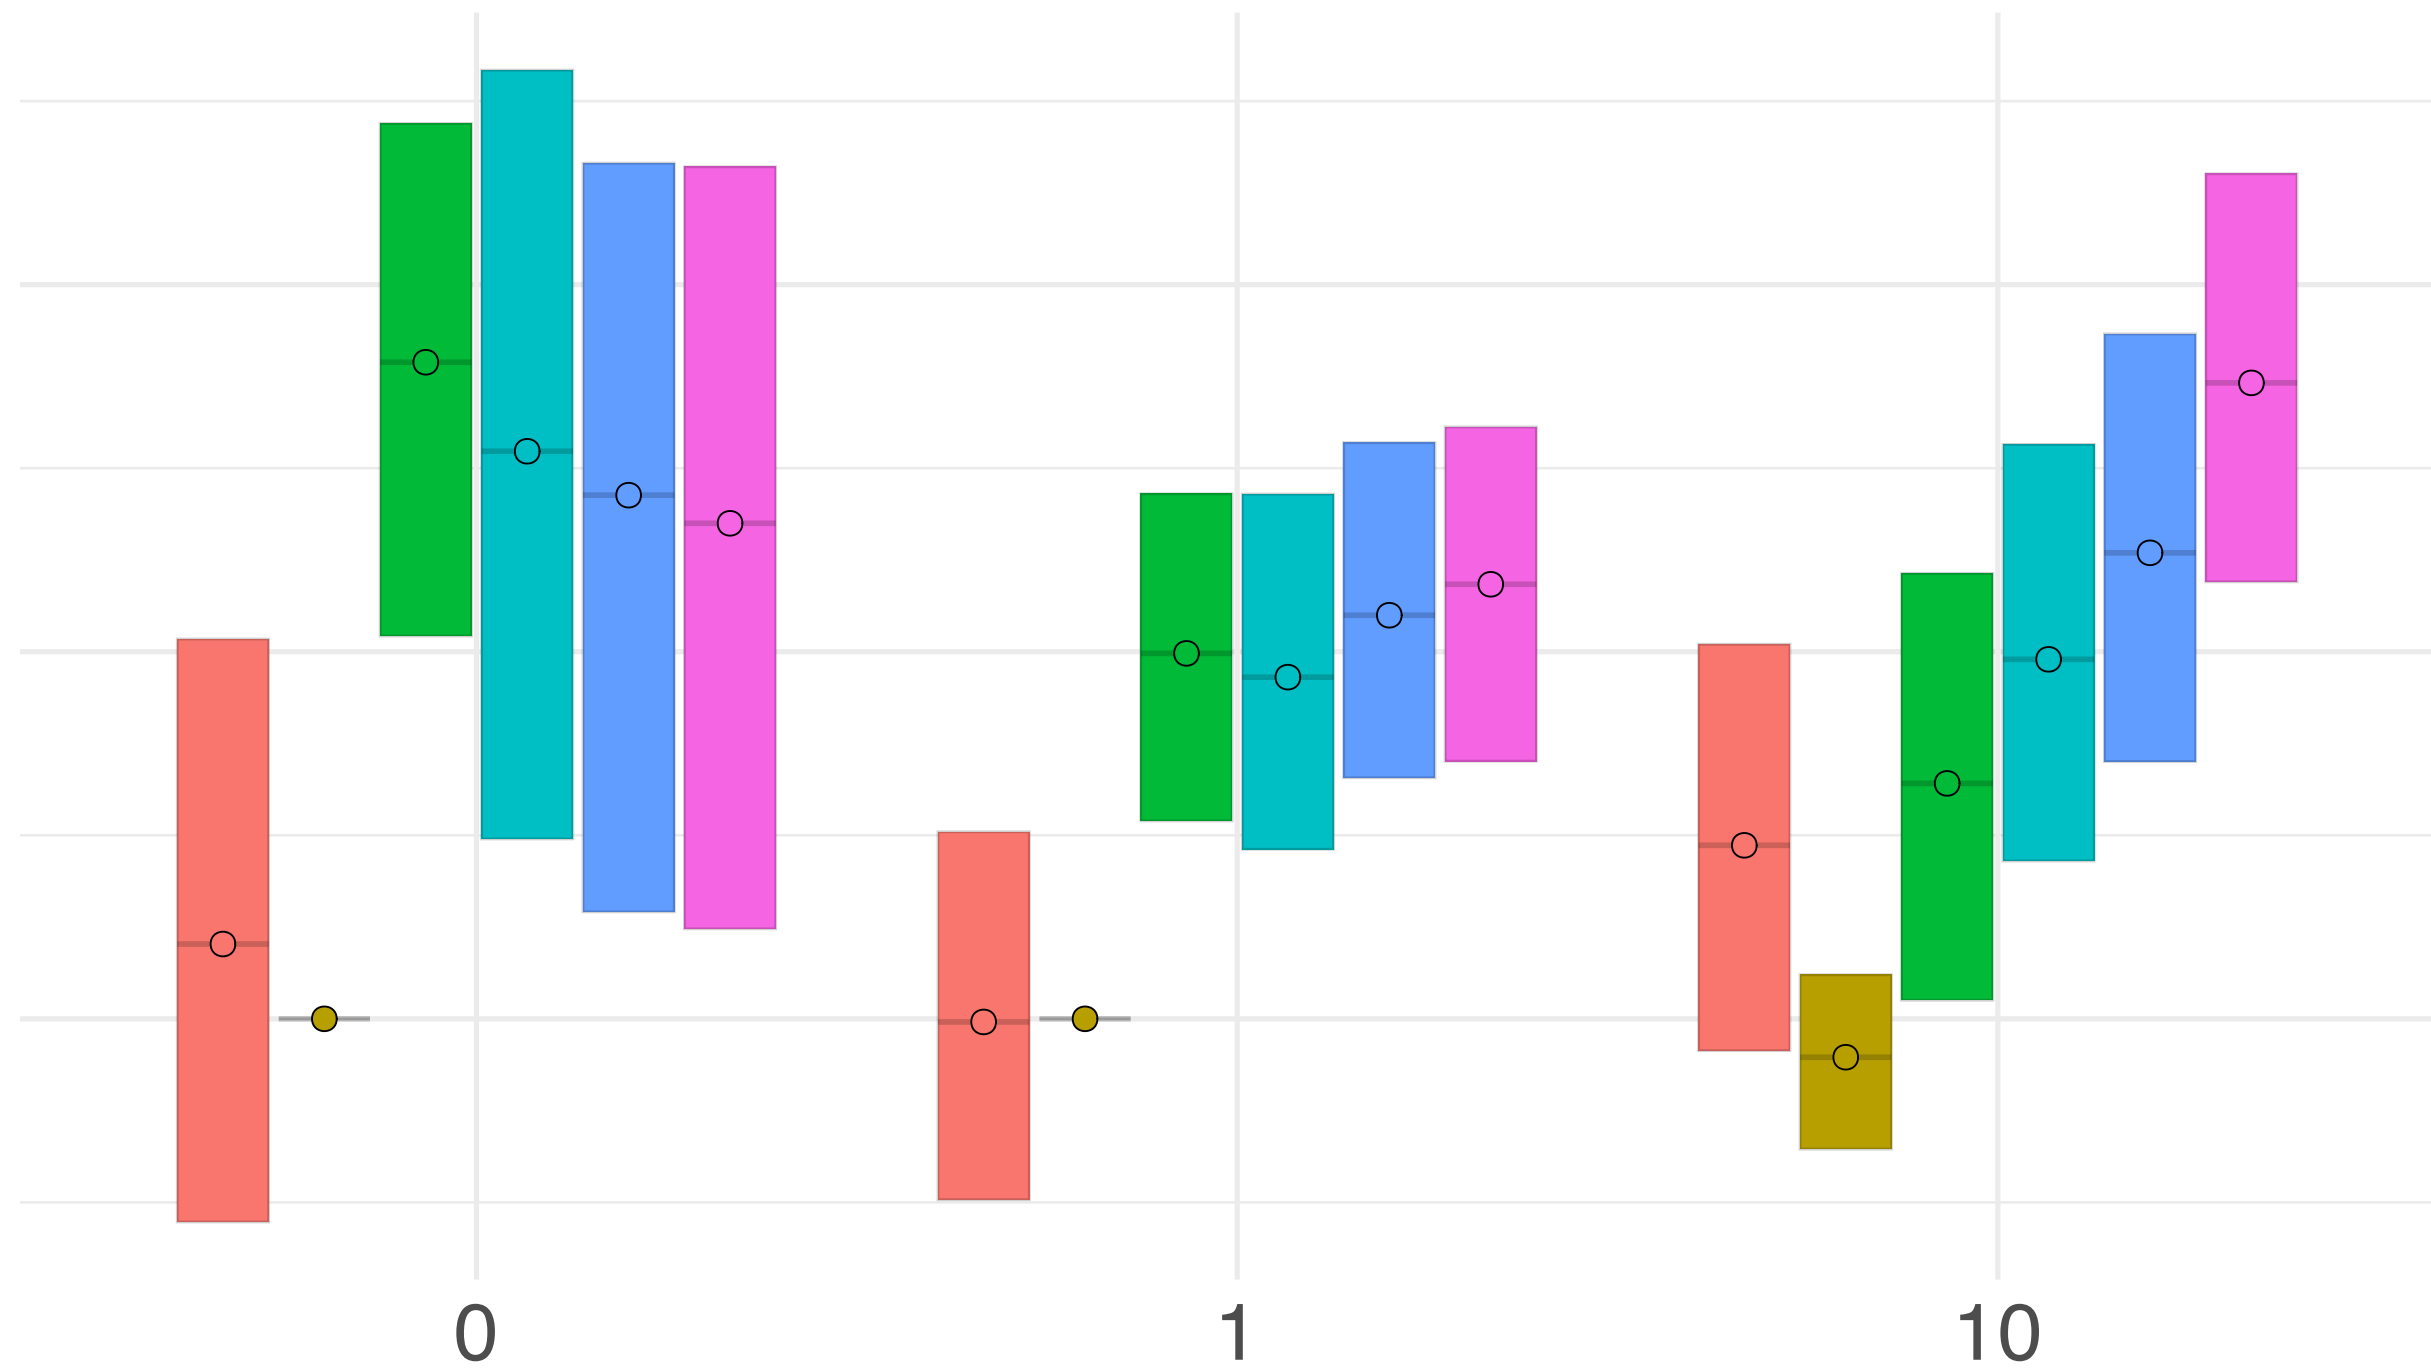

Supplement: supplementary_material [file attachment]
