# Supplementary material
Source: ML conference proceedings conference paper supplement (https://openreview.net/forum?id=wpGJ2AX6SZ)

Correlation Coefficient

0.4  
0.2  
0.0

Subset 0

Subset 1

Model Prediction Bins

predictor

- gradient\_boosting
- linear\_svm
- logistic\_regression
- naive\_bayes
- random\_forest
- human (control)
- human (4 examples)
- human (8 examples)
- human (12 examples)

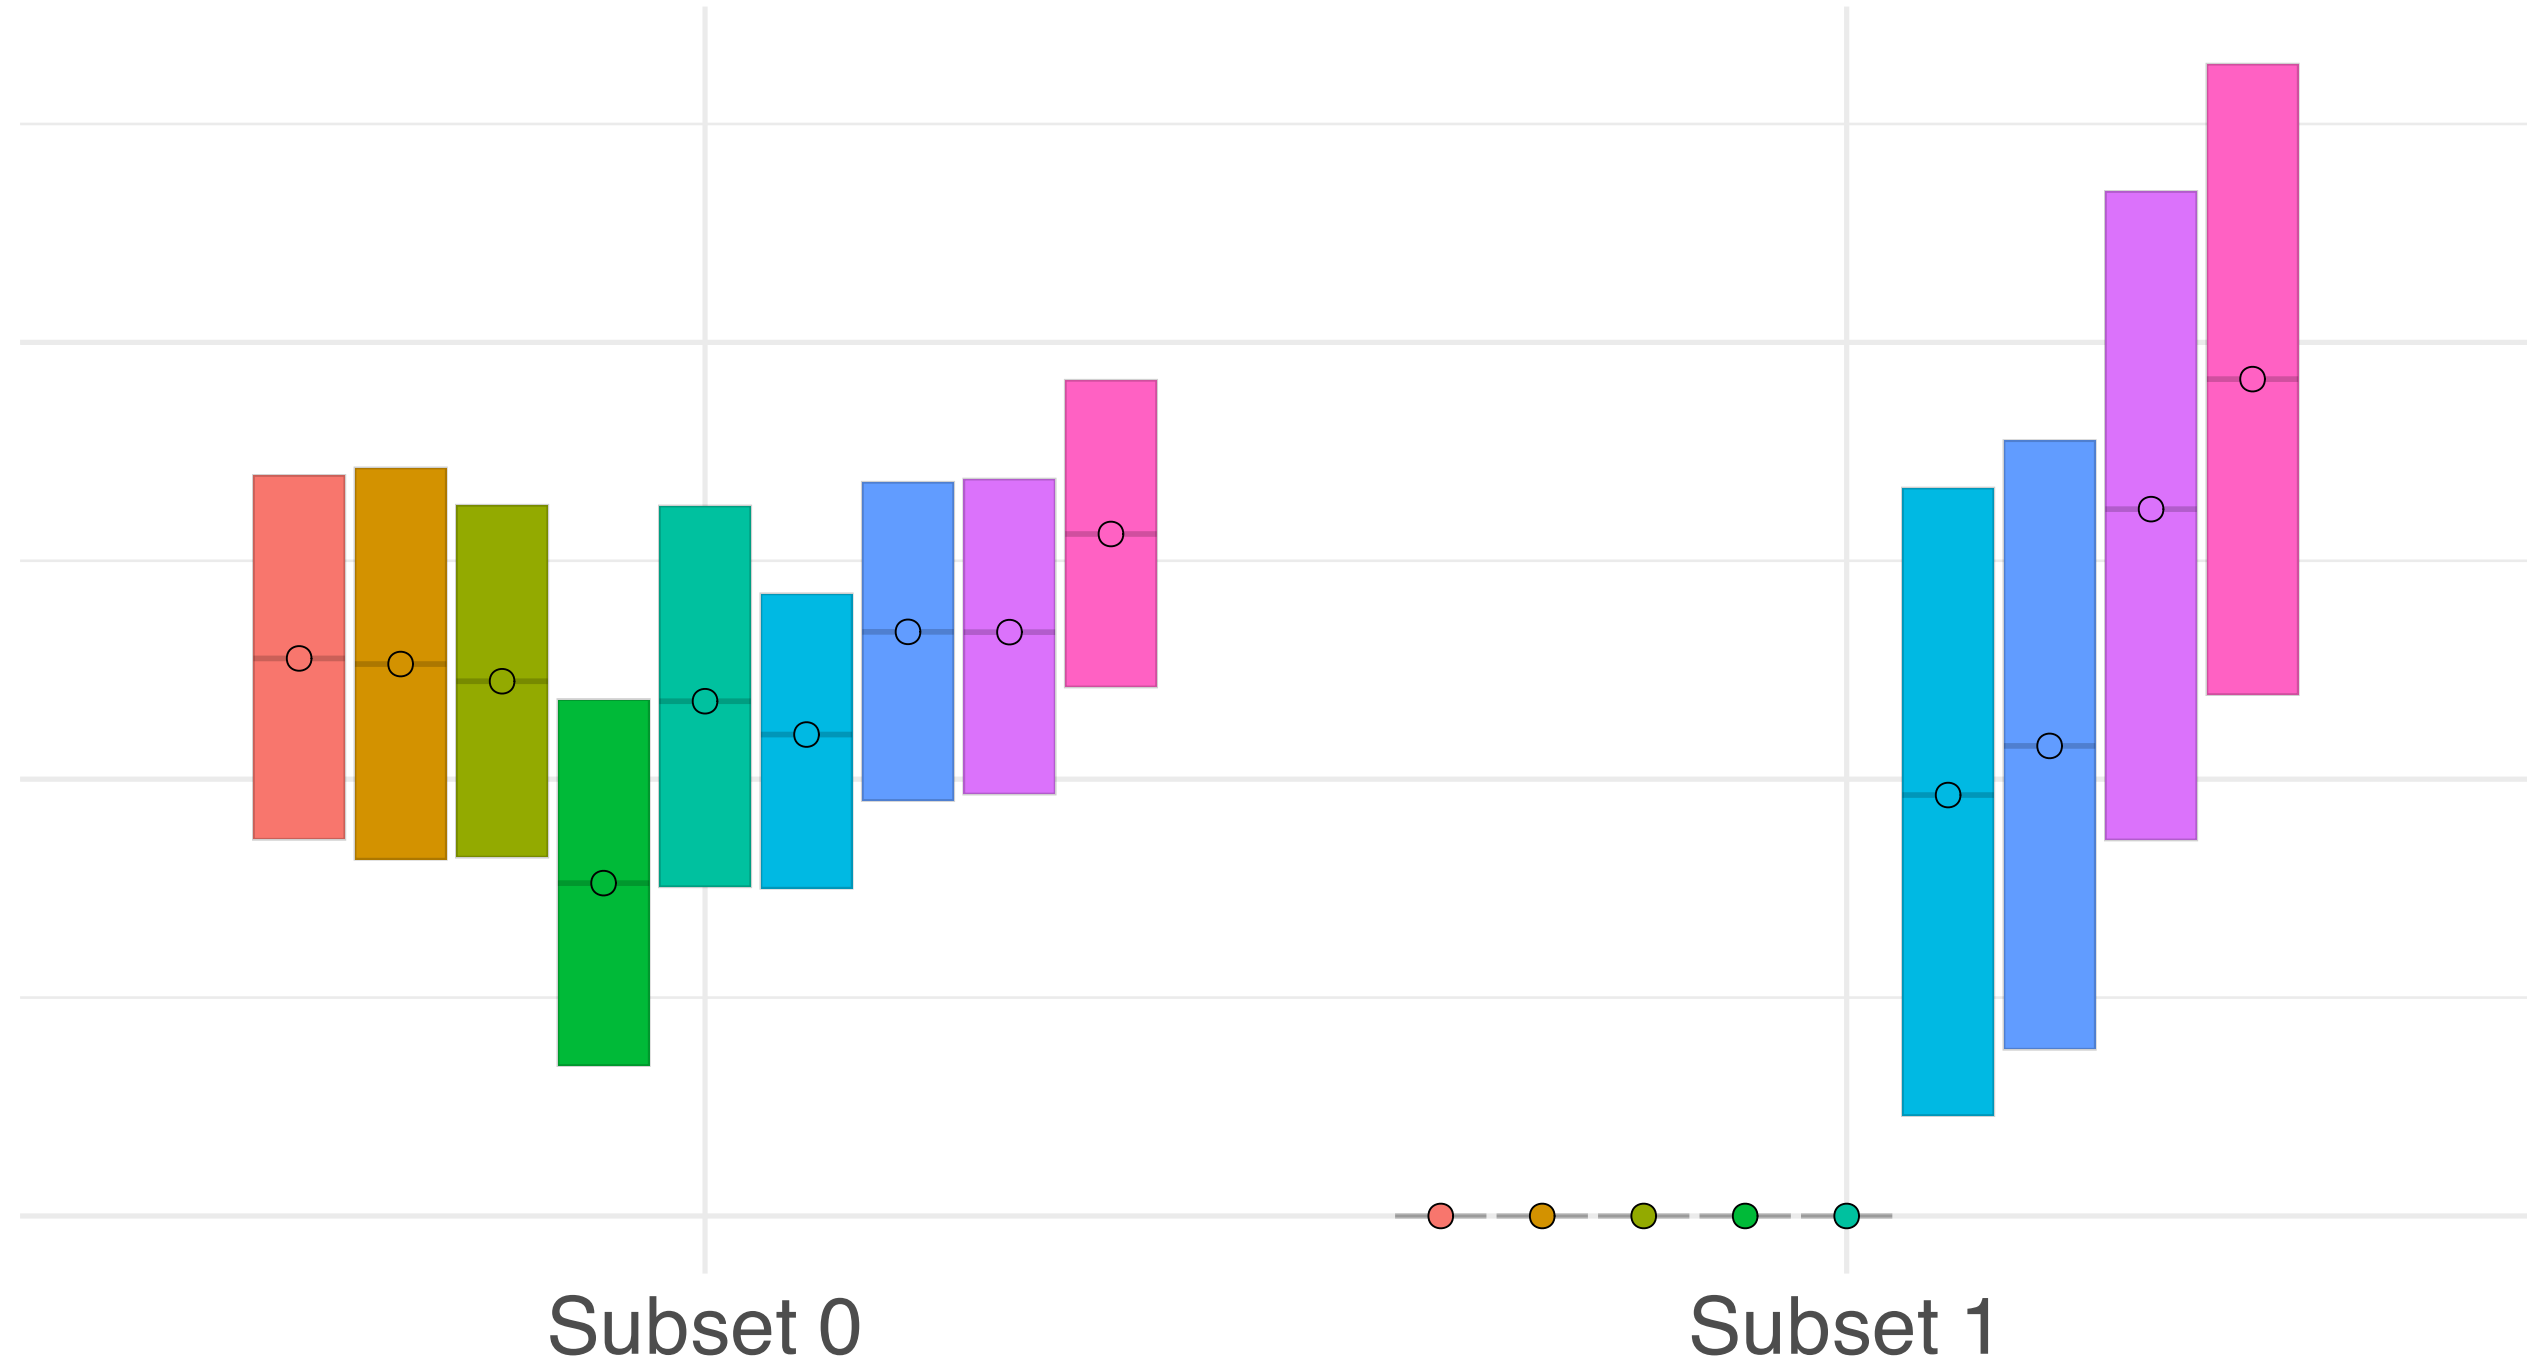

Supplement: supplementary_material [file attachment]
