# Supplementary material
Source: ML conference proceedings conference paper supplement (https://openreview.net/forum?id=wpGJ2AX6SZ)

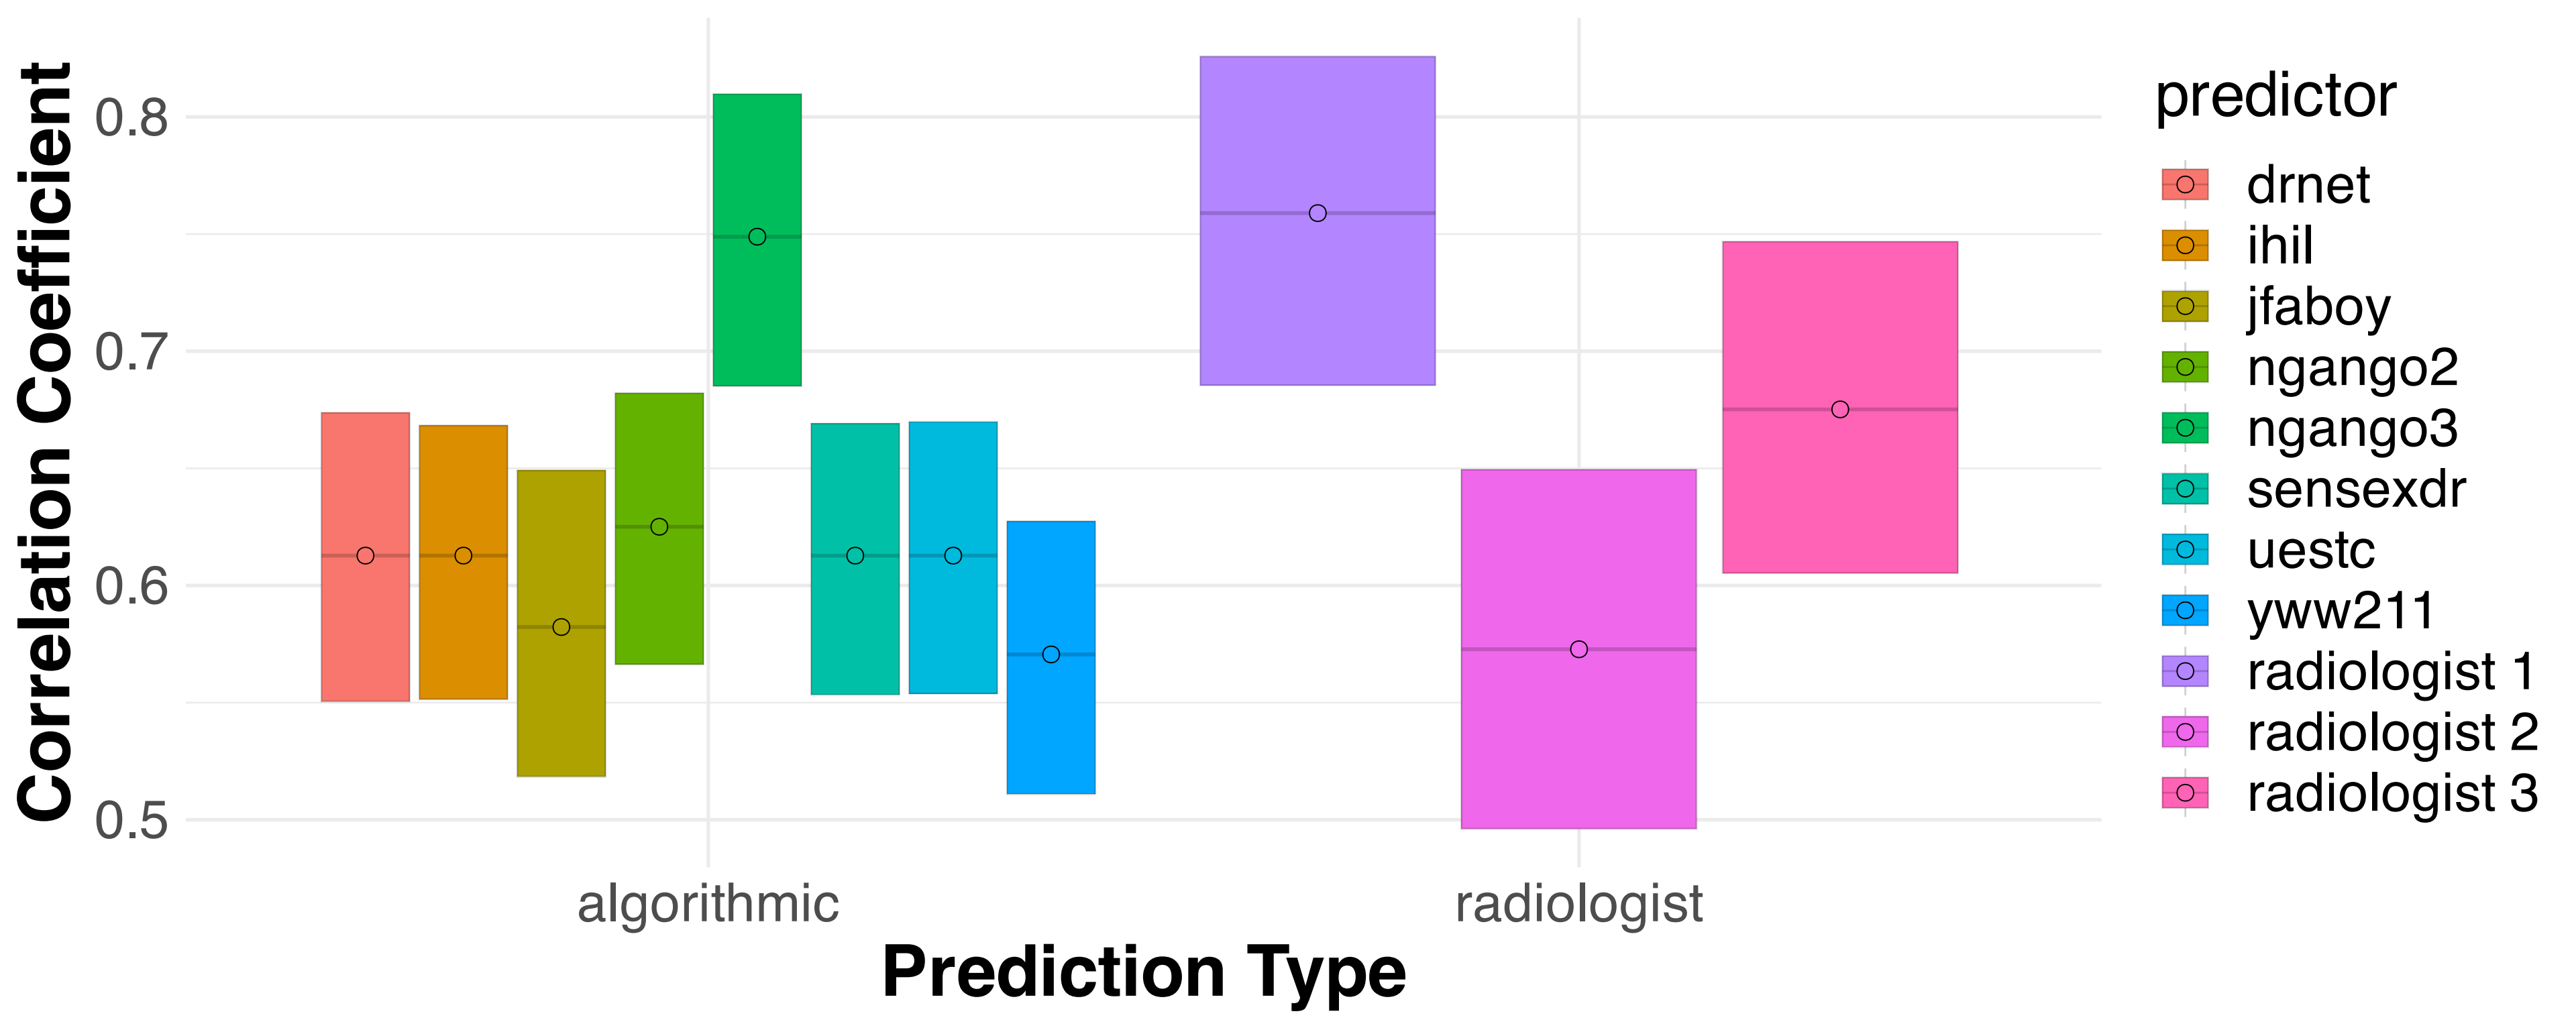

Supplement: supplementary_material [file attachment]

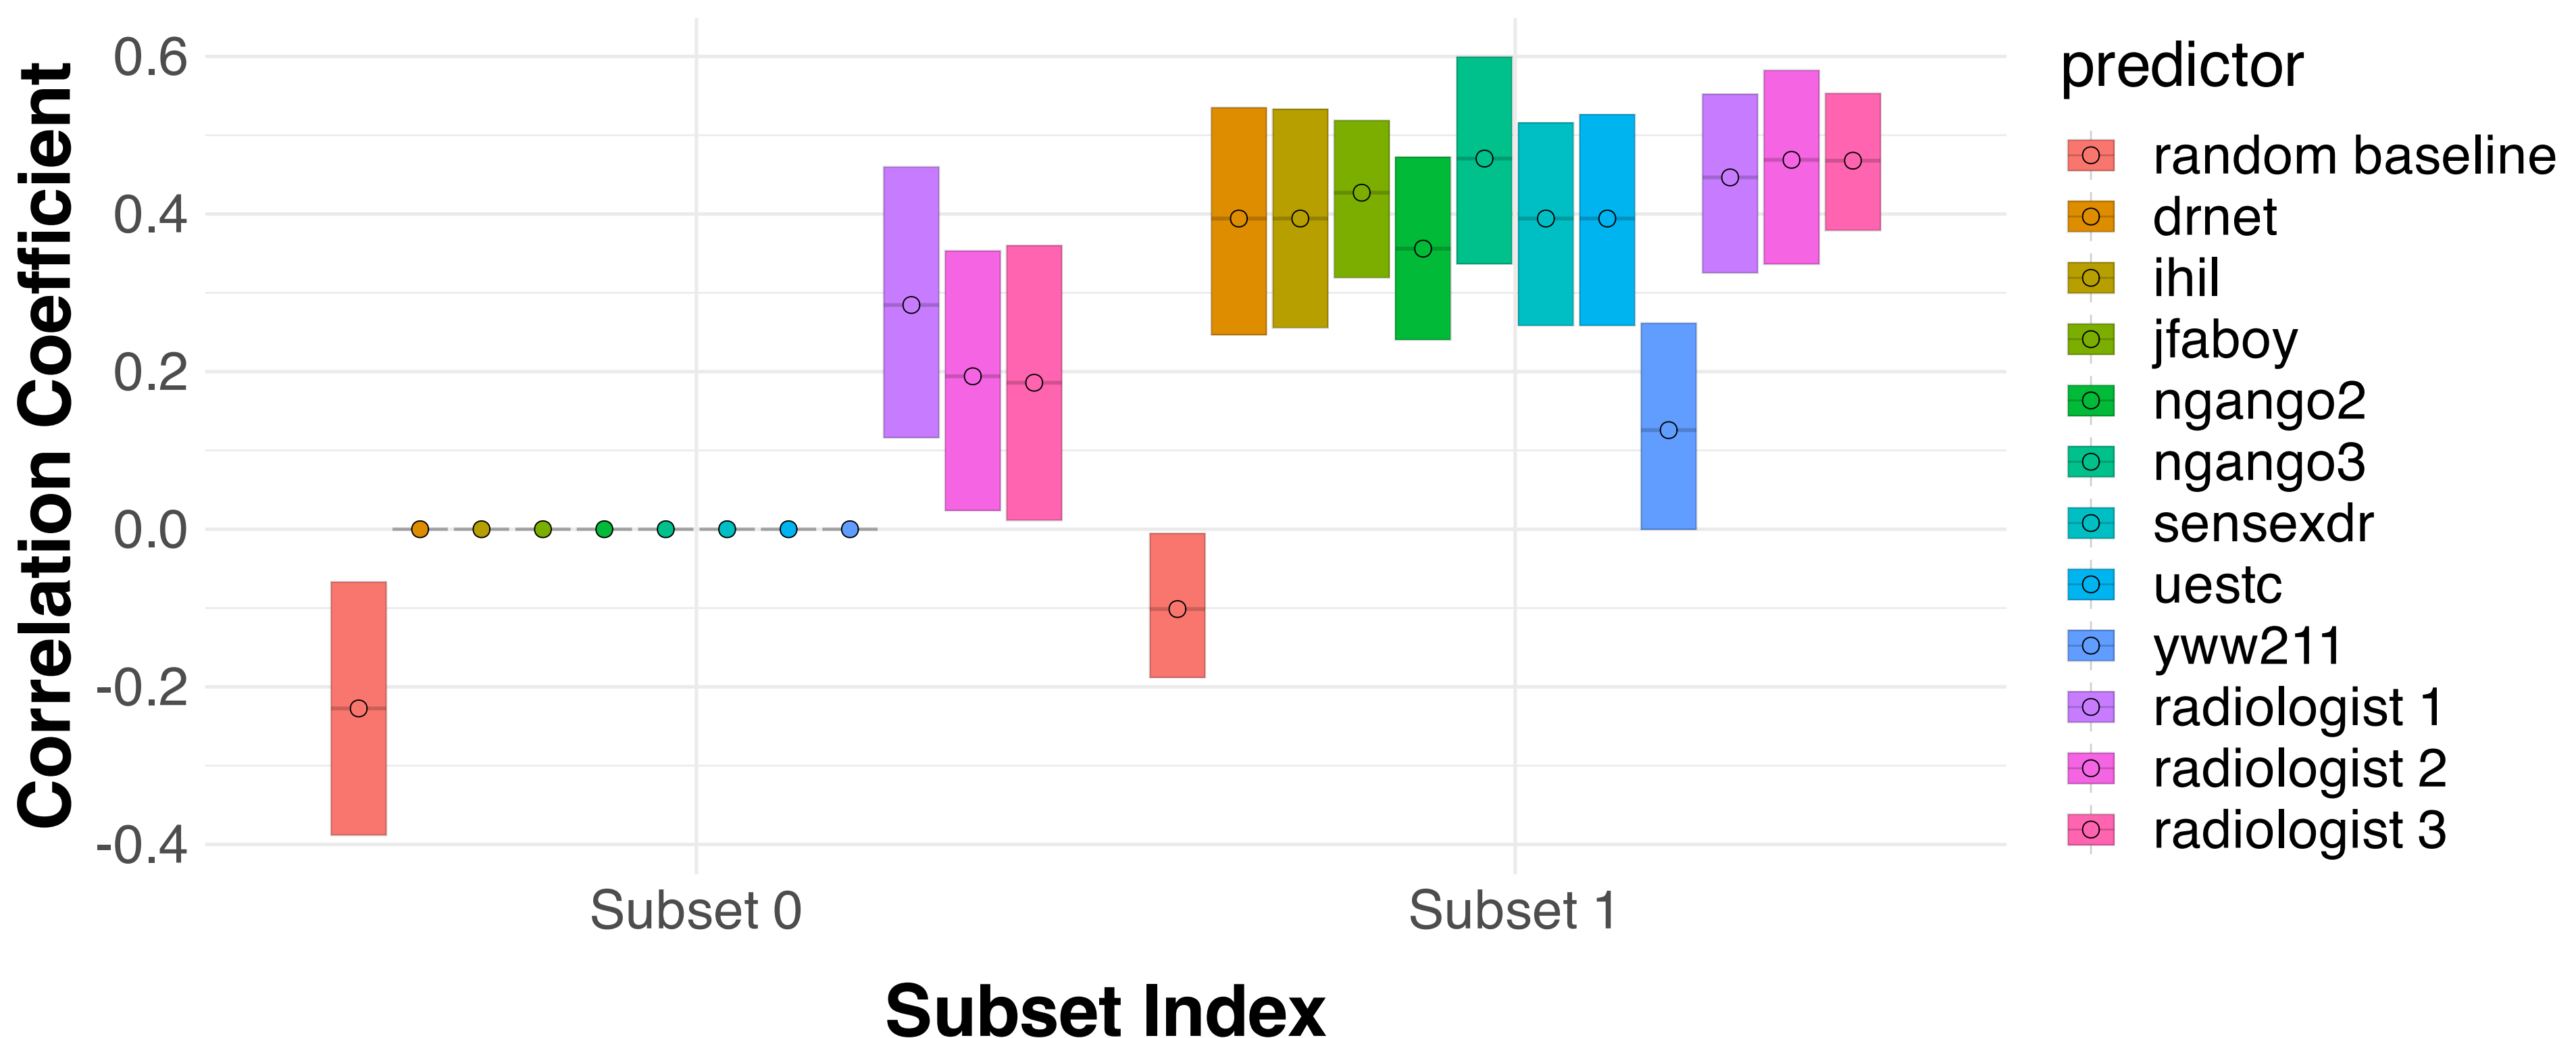

Supplement: supplementary_material [file attachment]

Correlation Coefficient

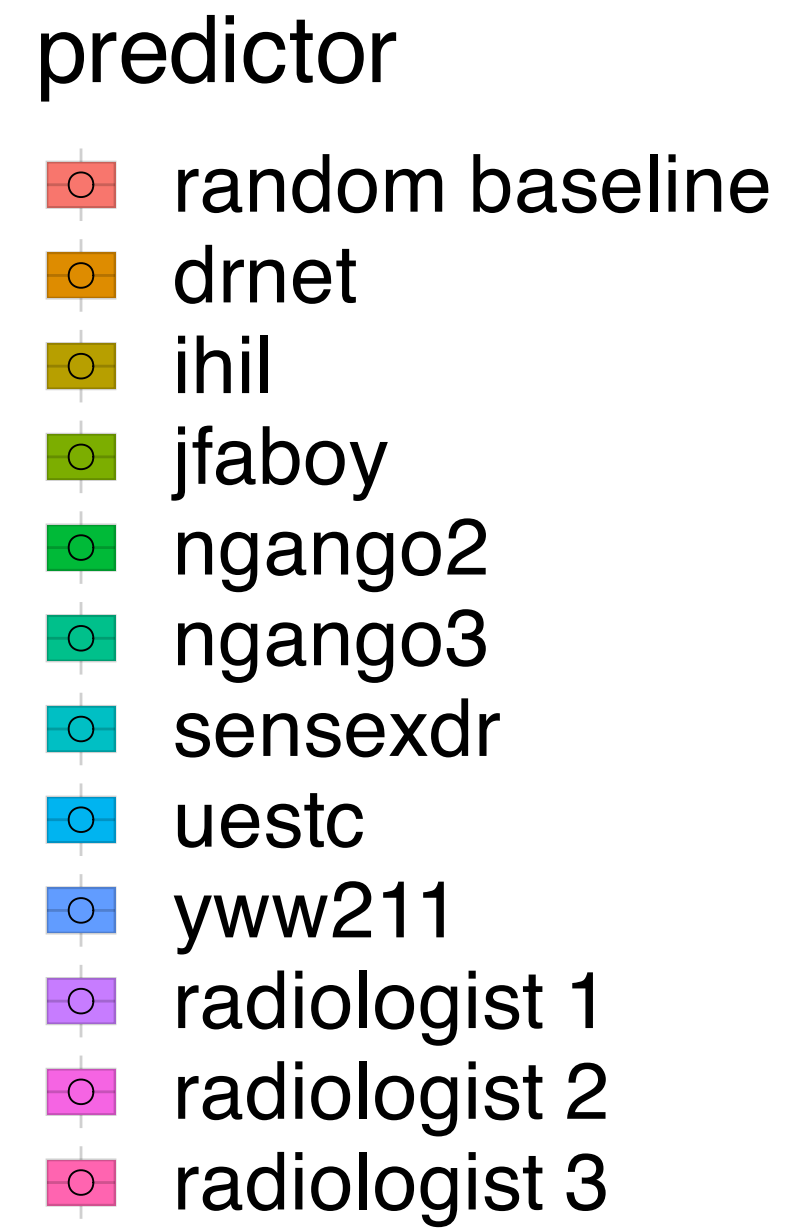

Subset 0

Subset 1

Subset Index

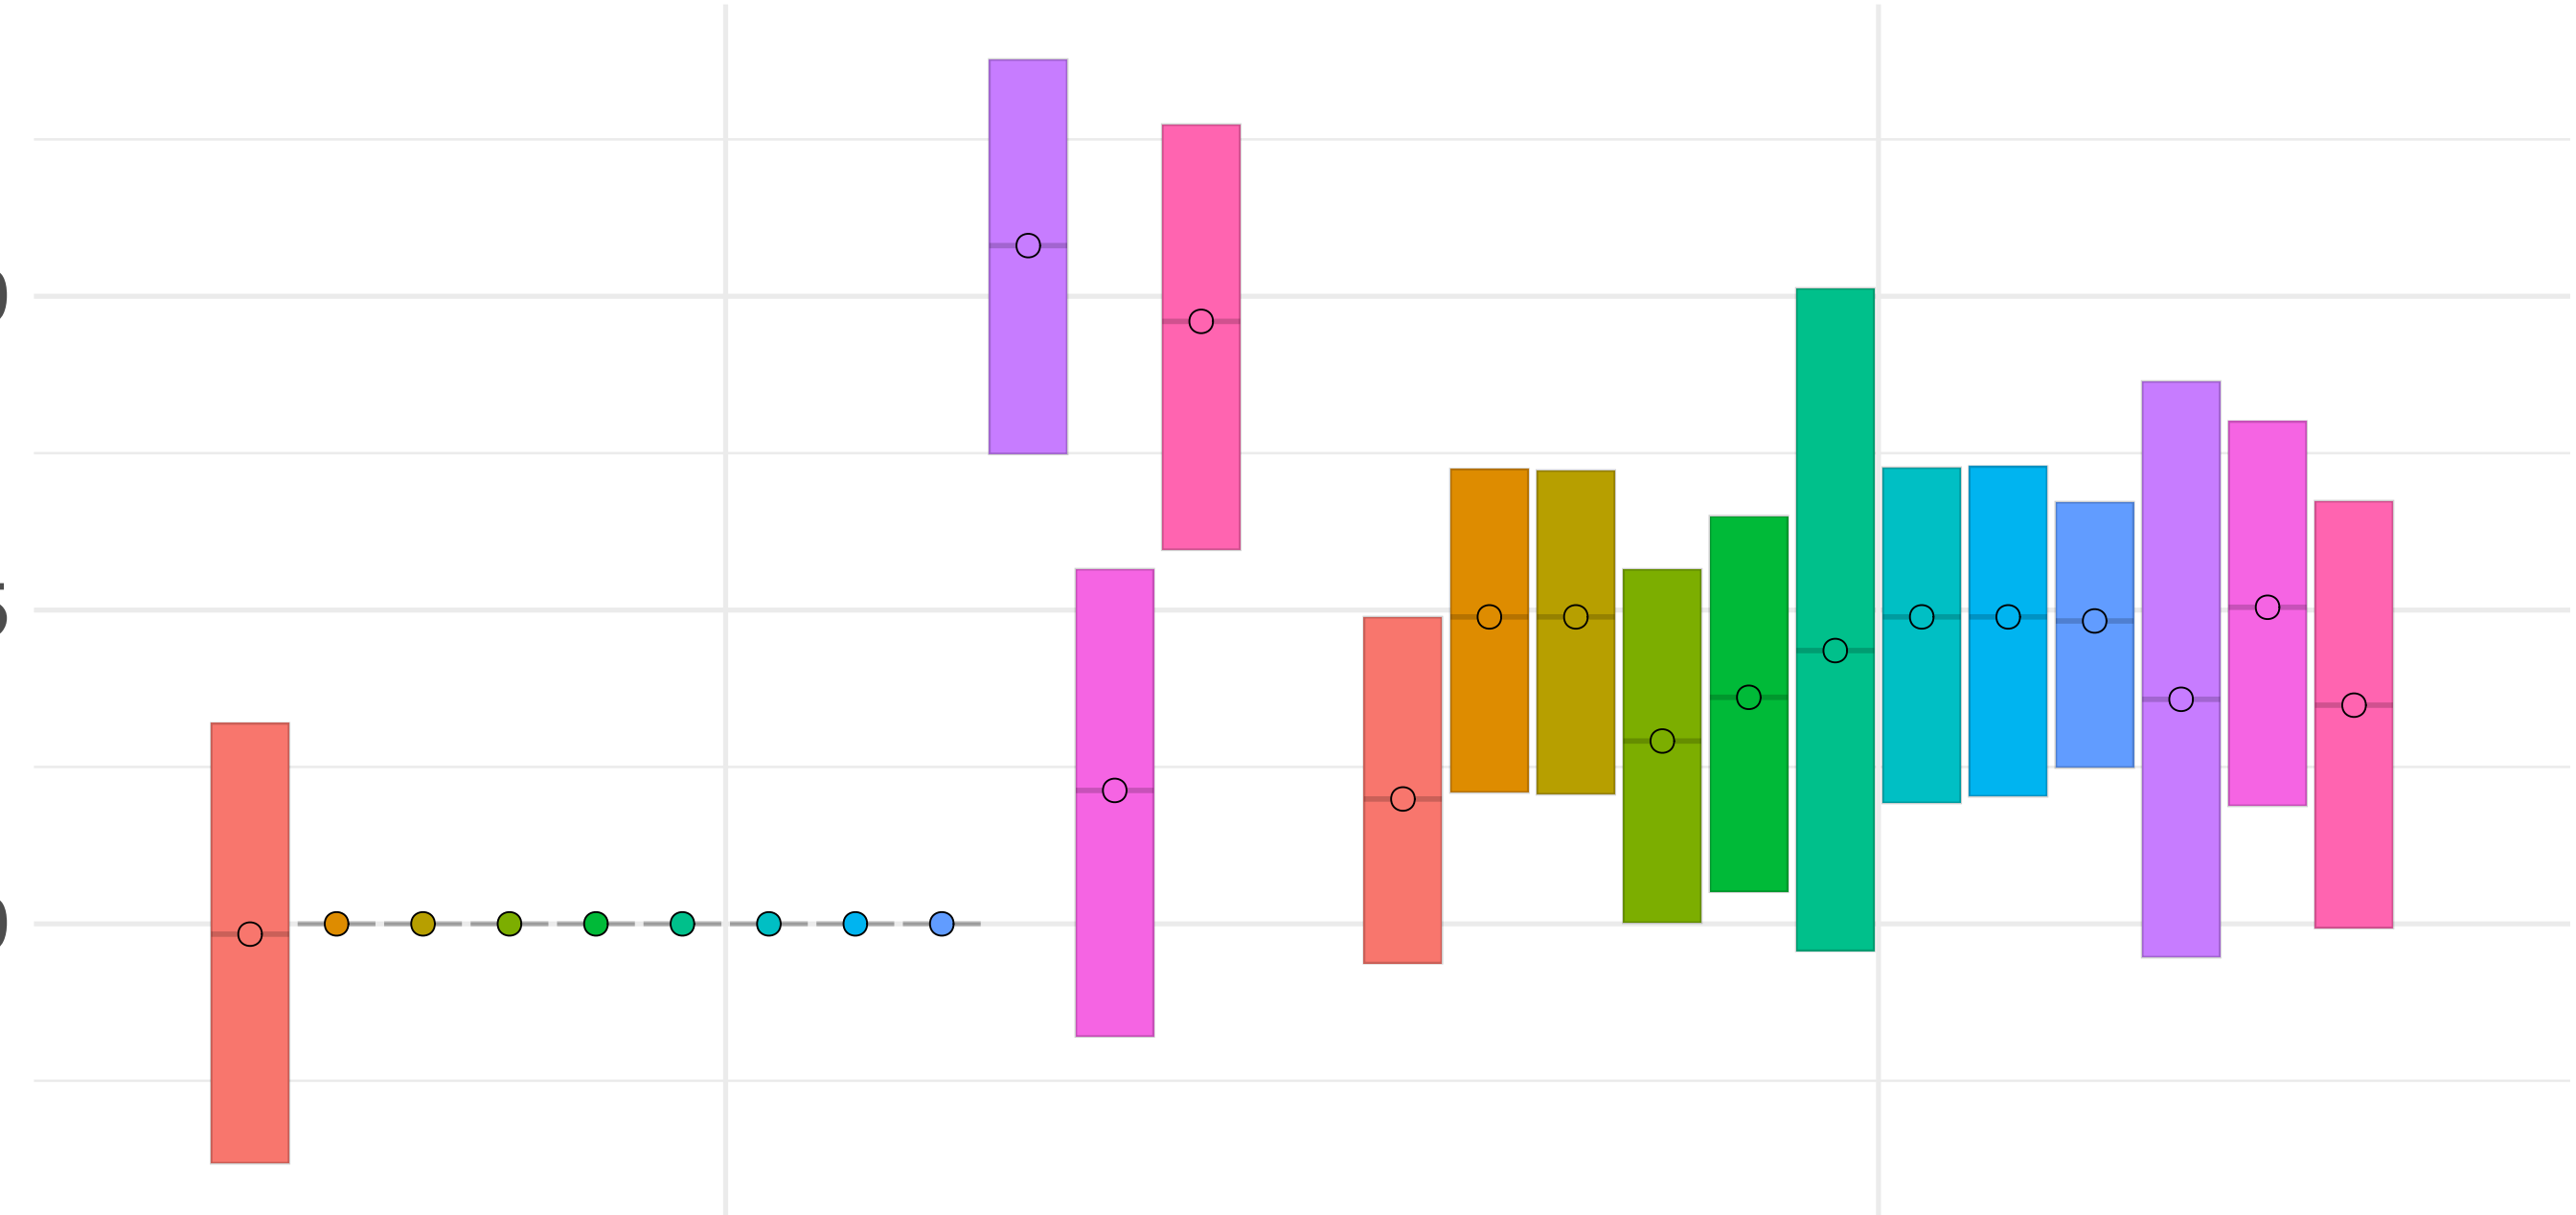

Supplement: supplementary_material [file attachment]

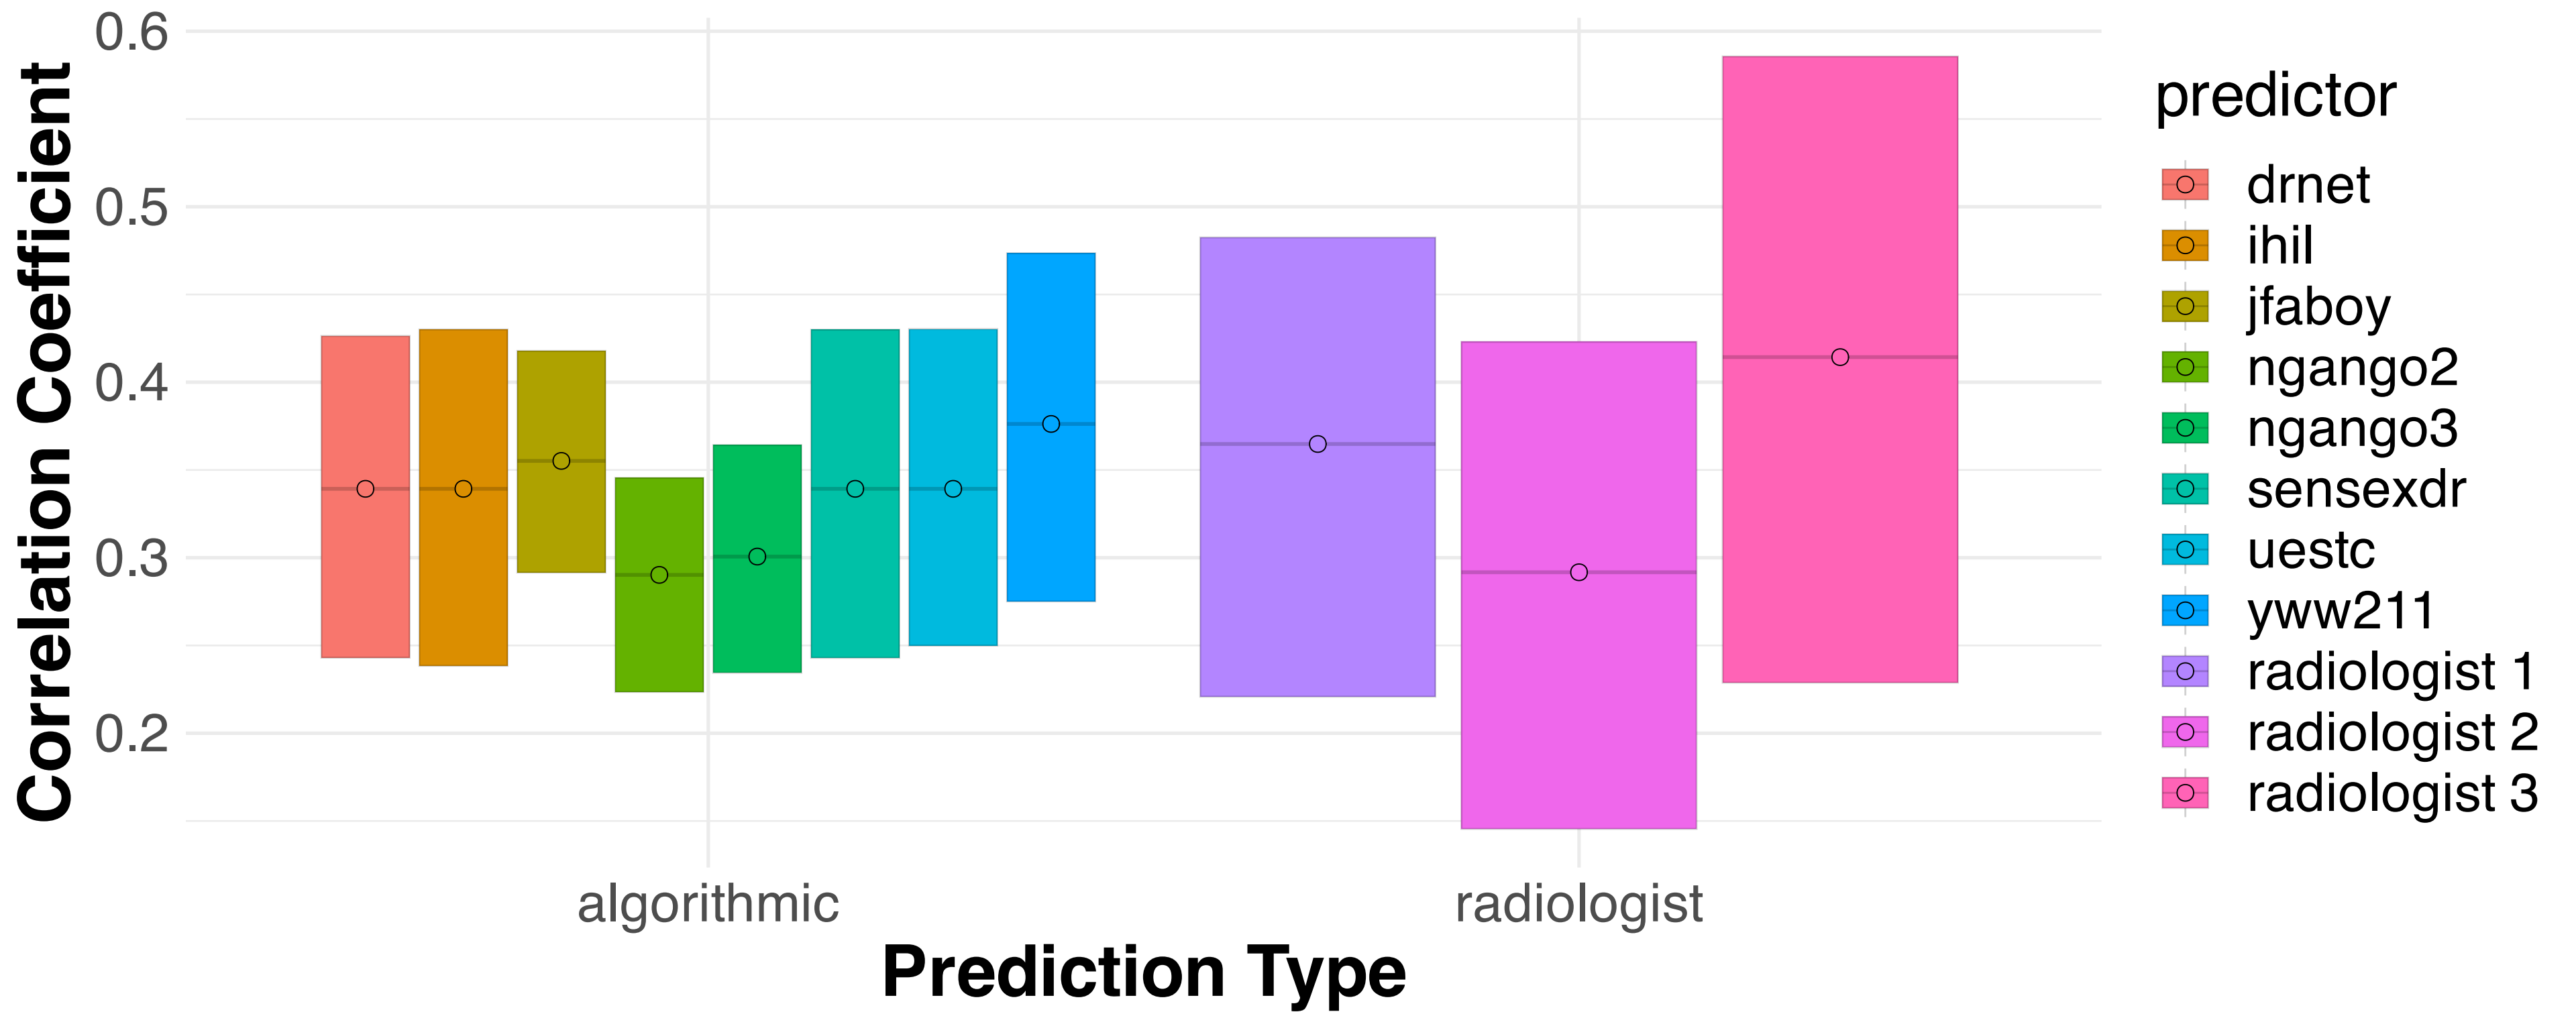

Supplement: supplementary_material [file attachment]

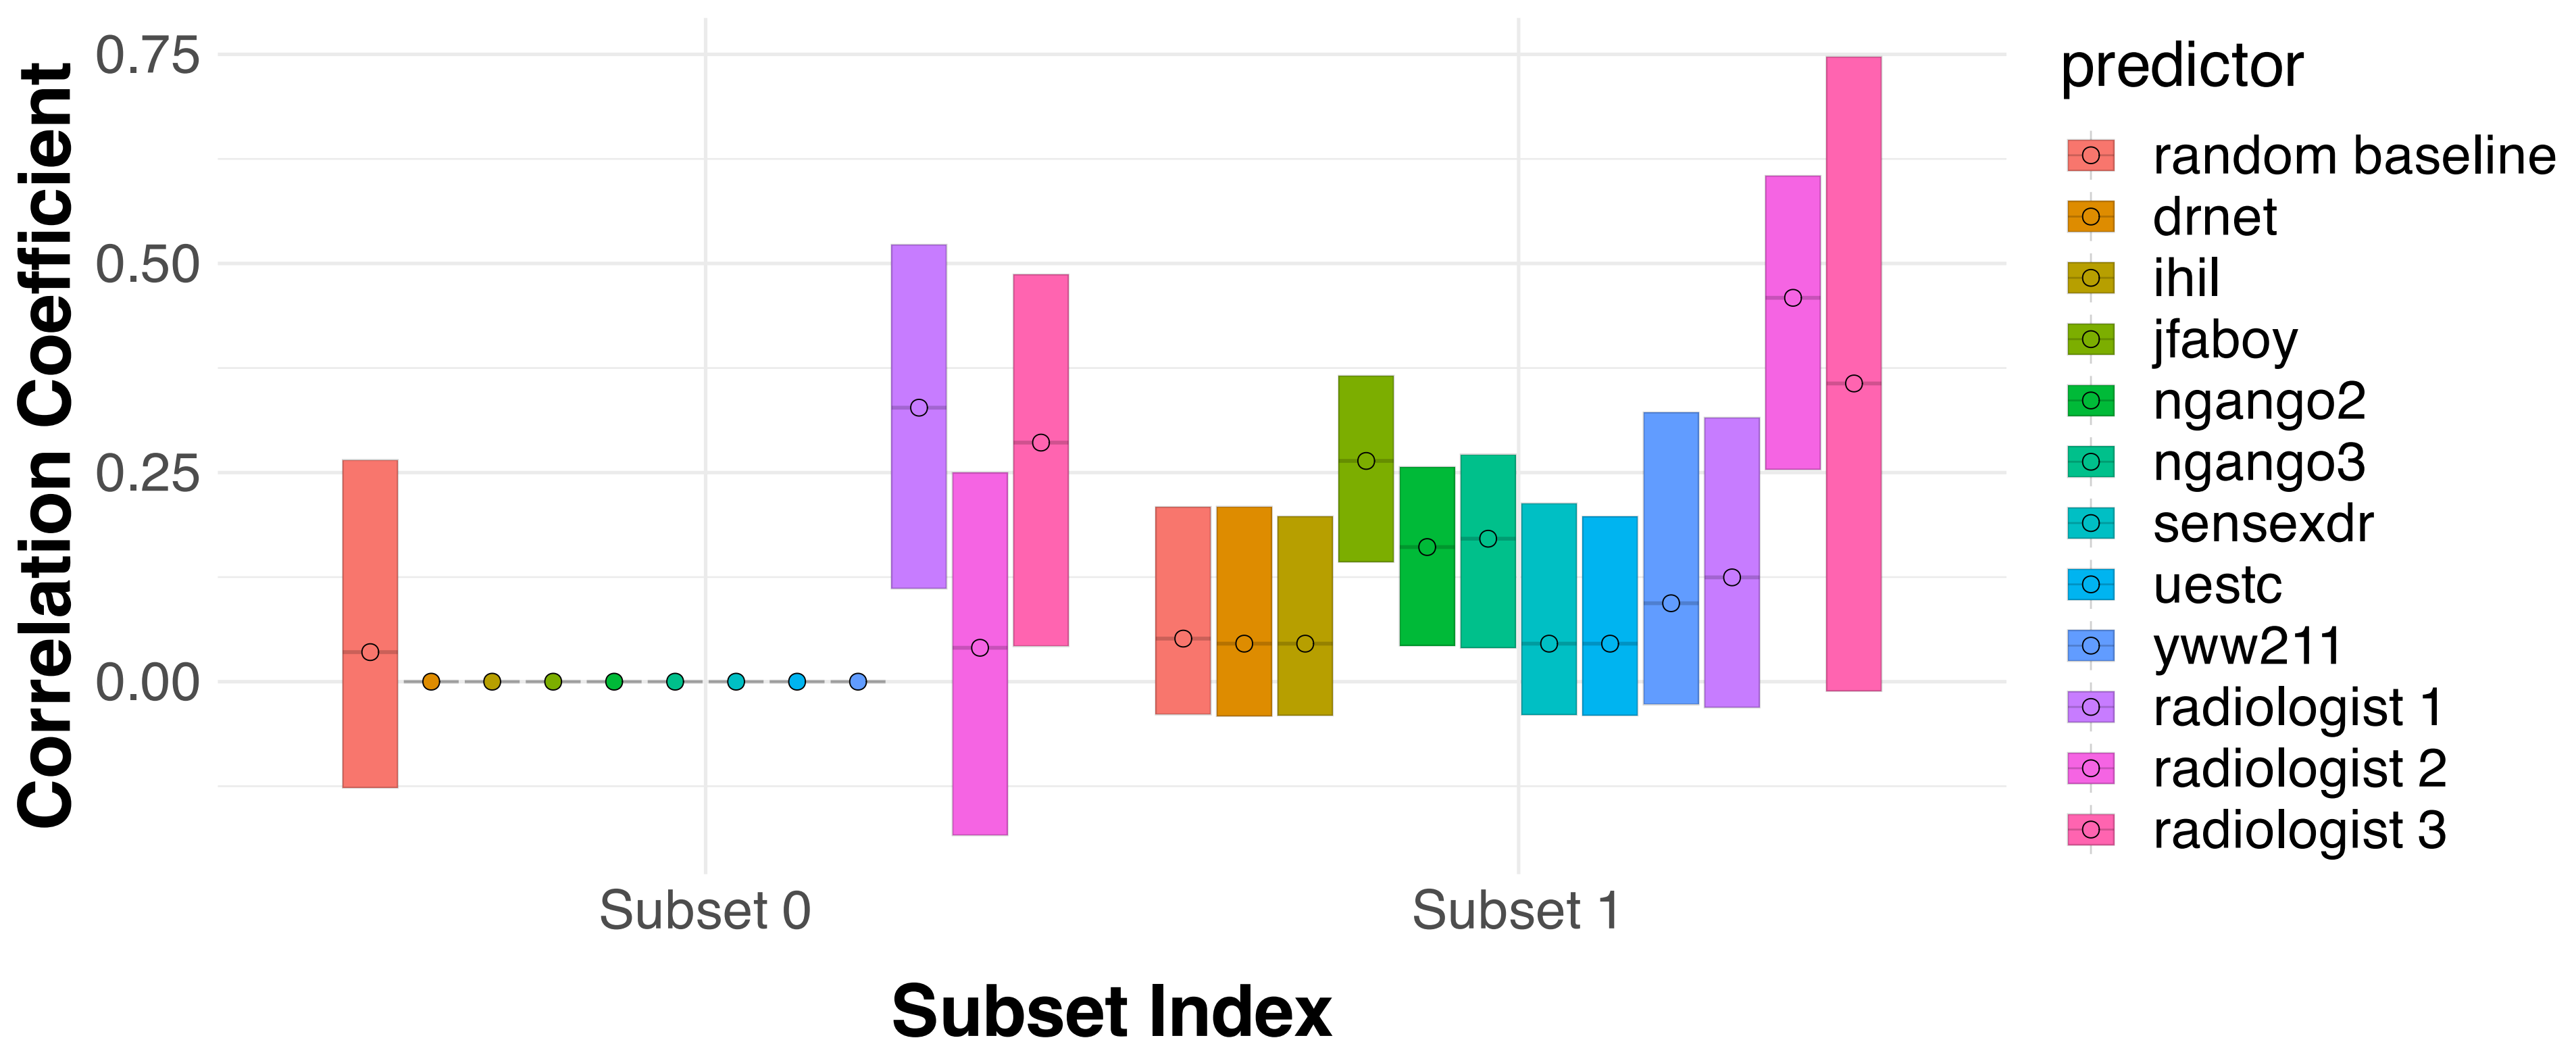

Supplement: supplementary_material [file attachment]

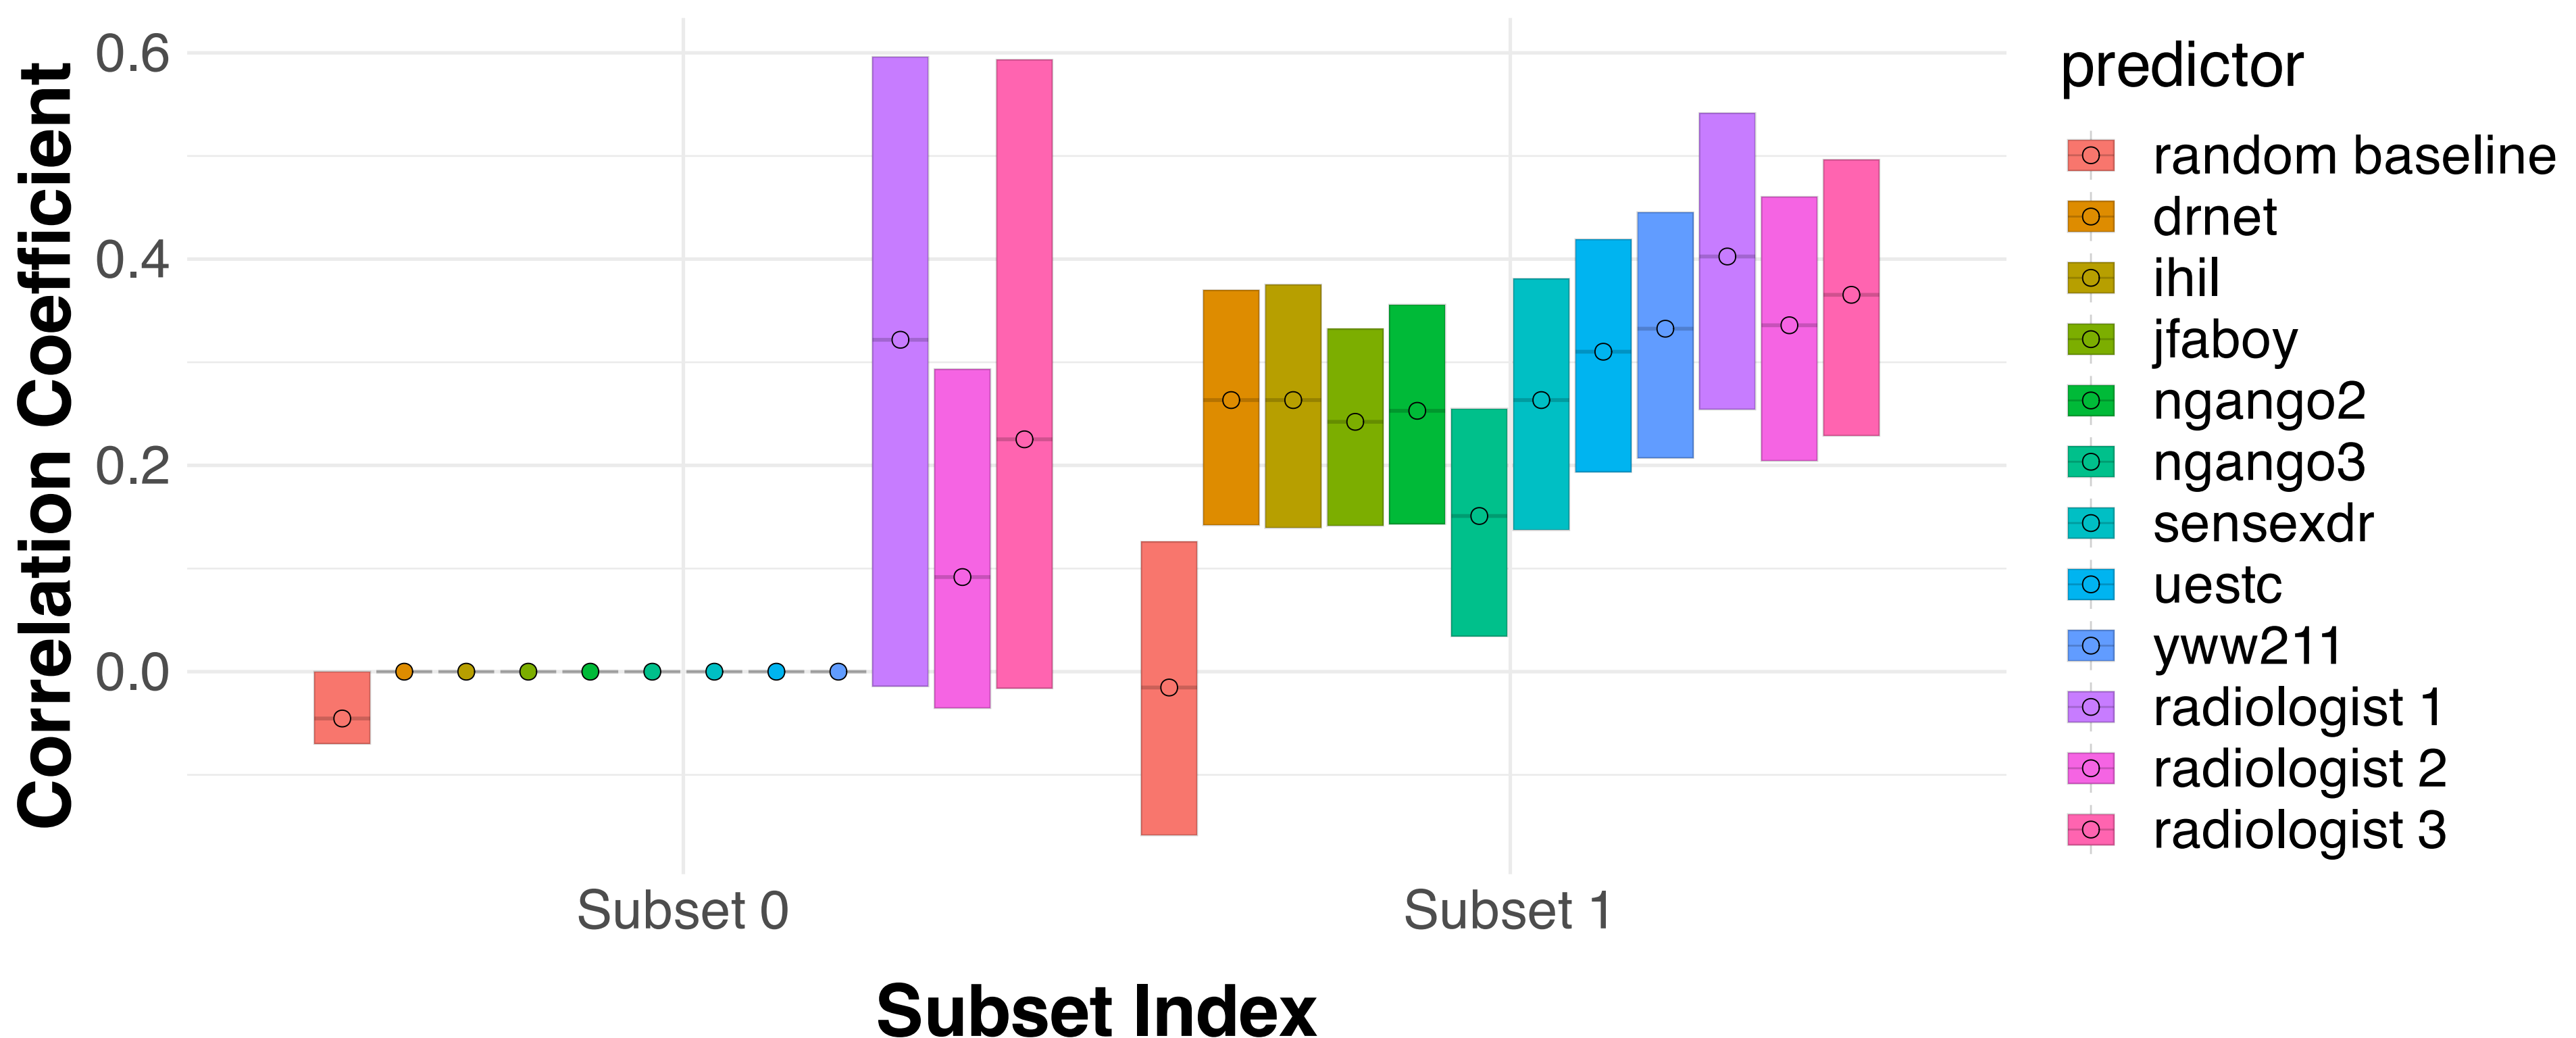

Supplement: supplementary_material [file attachment]

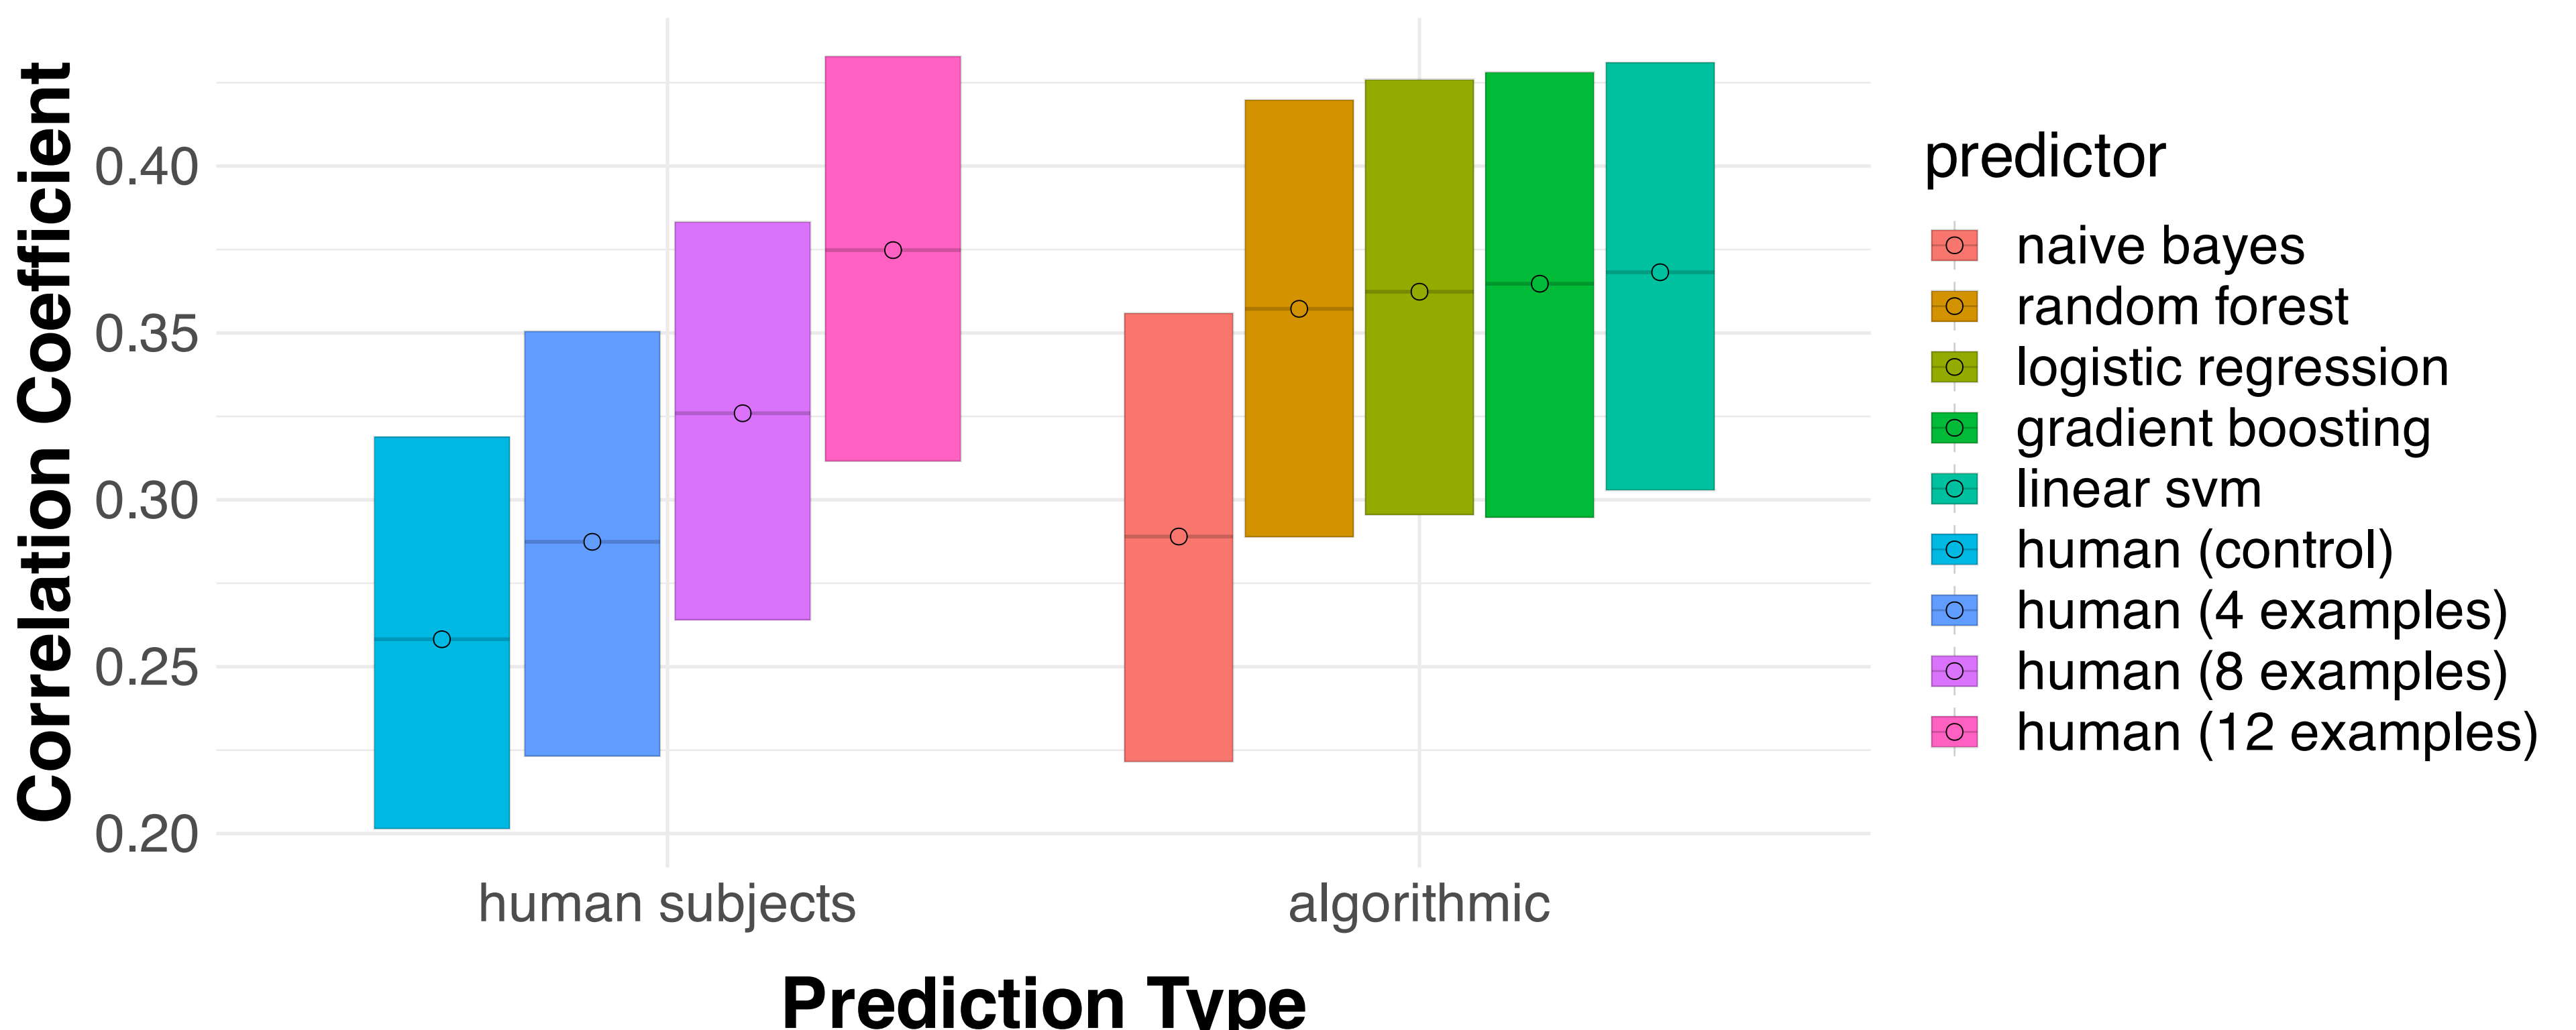

Supplement: supplementary_material [file attachment]

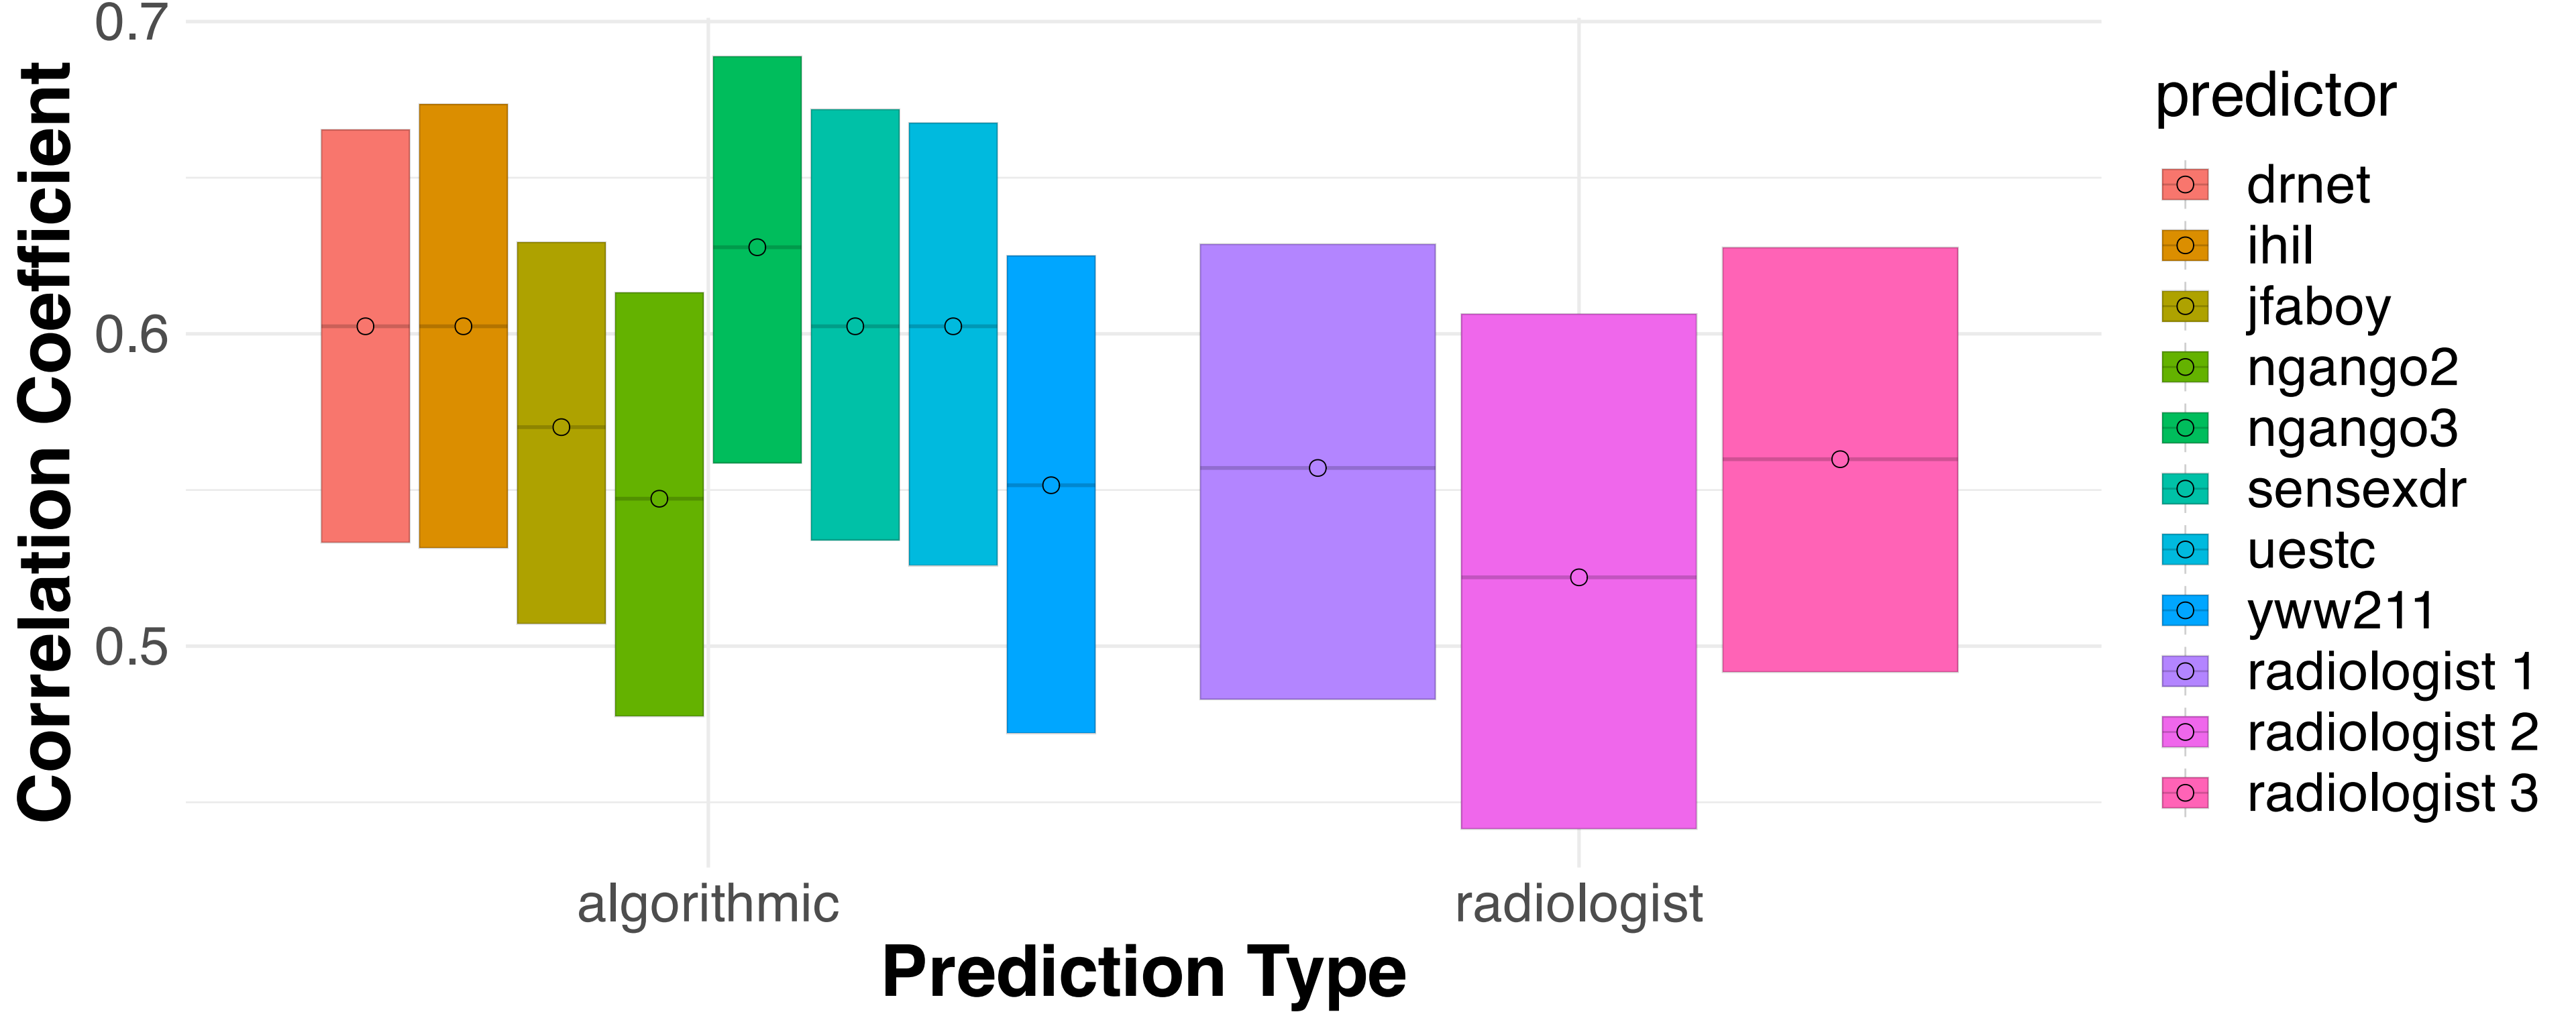

Supplement: supplementary_material [file attachment]
